# Supplementary material for: The dental infections in patients undergoing preoperative dental examination before surgical treatment of saccular intracranial aneurysm
Source: BMC Res Notes. 2018 Aug 20;11:600. doi: 10.1186/s13104-018-3704-z (PMC6102815; doi:10.1186/s13104-018-3704-z)
Supplement: Supplementary file 2 — Additional file 2. Demographic, clinical and bacterial DNA findings of the patients with unruptured aneurysm. [file 13104_2018_3704_MOESM2_ESM.xlsx]

## Sheet: Taul1 - Taulukko 1
Sex_male1_female2	age	Toothbrushing_frequency_lessthaneveryday0_onceaday1_twiceaday2	Smoking_as_packyears	periapical_lesions_amount	Furcation_lesions_amount	vertical_pockets_amount	deep_caries_amount	Infectio_score	four_to_five_mm_pockets_amount	six_and_over_mm_pockets_amount	four_to_five_yes1_no0	six_and_over_yes1_no0	periapical_lesions_yes1_no0	aggregatibacter_actinomycetemcomitans_concentration	porphyromonas_gingivalis_concentration	universal_bacterial_dna_concentration	streptococcal_concentration	prevotella_intermedia_concentration	fusobacteria_nucleatum_concentration	logarithmic_aa	logarithmic_pg	logarithmic_universal	logarithmic_sc	logarithmic_prevo	logarithmic_fuso
1	39	2	10	2	1	0	1	4	4	4	1	1	1	0	0	162.137	4.6011	0	62.0722			2.20988	0.662862		1.7929
2	60	1	40	1	2	2	1	3	1	5	1	1	1	0.026823	8.76882	75.3275	1.12227	5.34865	26.2756	-1.57149	0.942941	1.87695	0.0500985	0.728244	1.41955
2	55	2	35	0	0	0	0	1	4	0	1	0	0	0	0	253.767	0.0973878	0	7.52498			2.40444	-1.0115		0.876505
2	43	2	0	0	0	0	0	2	3	5	1	1	0	52.5889	0	149.235	3.99217	24.9846	19.4455	1.72089		2.17387	0.60121	1.39767	1.28882
1	60	2	0	1	0	0	0	2	0	0	0	0	1	4.46249	0	115.585	0.250655	0	2.82892	0.649577		2.0629	-0.600923		0.451621
2	50	0	0	0	1	0	0	2	4	1	1	1	0	0.122047	1.7492	74.5801	0.370035	4.84712	30.8099	-0.913473	0.242841	1.87262	-0.431758	0.685483	1.48869
1	60	0	0	6	0	0	5	8	3	6	1	1	1	0.935887	0	823.142	11.8884	45.7435	160.867	-0.0287766		2.91547	1.07512	1.66033	2.20647
1	54	0	0	0	0	0	0	2	1	5	1	1	0	0	0	71.929	0.0944205	0.0023652	15.4708			1.8569	-1.02493	-2.62613	1.18951
1	44	0	26	1	0	0	3	4	2	14	1	1	1	0	0	133.922	3.79106	0.0001984	17.2196			2.12685	0.578761	-3.70246	1.23602
2	58	2	0	0	0	0	0	0	0	0	0	0	0	0.493912	0.695954	160.379	0.930044	0.000575165	16.3454	-0.30635	-0.157419	2.20515	-0.0314967	-3.24021	1.2134
1	68	1	50	0	1	0	0	2	7	3	1	1	0	0	7.91591	487.622	1.67097	0.000471988	64.4524		0.898501	2.68808	0.222969	-3.32607	1.80924
2	62	2	0	0	0	0	0	0	0	0	0	0	0	0.602308	0	182.097	1.48588	0	0.187829	-0.220181		2.2603	0.171983		-0.726238
2	52	2	15	0	0	0	0	1	1	0	1	0	0	0	0	159.335	0.236173	0.000369746	1.17009			2.20231	-0.626771	-3.4321	0.06822
2	39	2	0	0	0	0	0	2	6	1	1	1	0	0	0	217.77	0.135072	0.000680338	38.502			2.338	-0.869435	-3.16728	1.58548
1	57	1	90	1	1	0	1	3	7	2	1	1	1	0	0	260.17	0.401106	0	12.8175			2.41526	-0.39674		1.1078
2	63	2	0	2	0	1	0	5	3	2	1	1	1	0	0	262.038	0.915944	0.000434382	10.5275			2.41836	-0.038131	-3.36213	1.02232
2	47	2		0	4	2	2	2	4	4	1	1	0	0.131756	0	135.041	0.232814	0.883689	6.76074	-0.88023		2.13047	-0.632991	-0.0537006	0.829994
2	63	1	45	0	0	0	0	2	4	4	1	1	0	0	0	342.771	3.65148	0	57.24			2.535	0.562468		1.7577
1	67	2	0	0	1	0	0	1	2	0	1	0	0	0	0	422.367	8.08602	0.00140821	113.335			2.62569	0.907735	-2.85133	2.05436
2	67	2	13	0	0	0	0	2	1	2	1	1	0	0.0553182	9.21229	297.944	0.411134	0	31.4405	-1.25713	0.964367	2.47413	-0.386017		1.49749
2	23	2	0	0	0	0	0	0	0	0	0	0	0	635.058	0	1038.41	18.1287	0	15.337	2.80281		3.01637	1.25837		1.18574
2	62	2	0	0	0	1	0	2	7	1	1	1	0	0	0.0288799	36.4282	0.12455	1.05451	71.324		-1.5394	1.56144	-0.904655	0.0230491	1.85324
2	63	2	0	0	0	2	0	0	0	0	0	0	0	0	0	12.0088	1.57706	0	0.524827			1.0795	0.197848		-0.279984
1	59	1	30	4	0	0	4	8	4	4	1	1	1	0	0	82.1931	0.509801	2.58108	28.9929			1.91484	-0.292599	0.411802	1.46229
2	58	1	30	0	0	0	0	0	0	0	0	0	0	0	0	111.123	0.00102563	0	0.0316719			2.0458	-2.98901		-1.49933
1	36	2	15	0	0	0	0	1	3	0	1	0	0	0	0	69.3007	16.1265	0	8.57181			1.84074	1.20754		0.933073
2	65	2	0	0	0	0	0	1	3	0	1	0	0	0	0.00483161	19.4446	0.159617	0	10.1387		-2.31591	1.2888	-0.796922		1.00598
1	60	2	20	0	0	0	0	2	3	1	1	1	0	0	0	141.652	8.10982	0	60.4761			2.15122	0.909011		1.78158
1	51	2	0	0	0	0	0	1	1	0	1	0	0	0.245743	0	24.0441	2.47916	0	5.091	-0.609519		1.38101	0.394305		0.706803
2	53	1	30	1	1	1	1	4	2	0	1	0	1	0	1.14126	69.9604	2.77758	0	28.9929		0.0573856	1.84485	0.443666		1.46229
2	41	2	0	0	0	0	0	1	1	0	1	0	0	0	0	15.2584	2.36744	0	0.211496			1.18351	0.37428		-0.674698
2	65	2	0	0	0	2	0	1	1	0	1	0	0	0	0	98.6042	3.68726	0	7.54679			1.9939	0.566703		0.877762
1	58	1	0	1	1	0	1	4	4	3	1	1	1	0	0	87.8269	2.40578	0	12.1668			1.94363	0.381256		1.08518
1	60	2	0	1	0	1	0	2	1	0	1	0	1	0	0	2.15478	0.177707	0	2.11795			0.333403	-0.750296		0.325916
2	54	2	20	0	0	1	0	2	5	3	1	1	0	0	2.29467	86.6836	8.76143	0	10.8995		0.36072	1.93794	0.942575		1.03741
2	57	1	1	1	0	1	0	2	2	0	1	0	1	0	0	131.661	1.98315	0	45.0157			2.11946	0.297355		1.65336
2	46	2	0	1	0	0	0	1	0	0	0	0	1	0	0	35.1167	7.41655	0	1.9139			1.54551	0.870202		0.281919
2	62	2	0	1	0	0	0	2	1	0	1	0	1	6.94913	0	59.5991	0.0881176	0	9.62398	0.841931		1.77524	-1.05494		0.983355
2	44	2	15	0	0	0	0	0	0	0	0	0	0	0	0	241.946	17.5659	0	53.3987			2.38372	1.24467		1.72753
2	60	2	40	0	0	0	0	1	0	0	0	0	0	0	0	10.9041	1.44833	0	1.31753			1.03759	0.160866		0.119759
1	41	1	15	0	0	0	0	1	4	0	1	0	0	0	0	121.757	2.8249	1.32836	18.0881			2.08549	0.451003	0.123315	1.25739
2	41	2	15	0	0	0	0	1	3	0	1	0	0	0	0	6.52548	0.400166	0	3.03243			0.814613	-0.39776		0.481791
2	63	2	0	1	0	0	0	1	0	0	0	0	1	0	0	3.93335	0.157448	0	0.152937			0.594762	-0.802862		-0.815488
1	58	1	60	3	1	0	0	4	3	0	1	0	1	0	0	60.1116	1.88845	0	56.4525			1.77896	0.276106		1.75168
2	56	2	15	0	0	0	0	1	5	0	1	0	0	0	0	62.0472	1.34752	0.23596	14.5623			1.79272	0.129535	-0.627162	1.16323
2	44	2	20	0	0	0	0	1	2	0	1	0	0	0	0	0.977915	0.196009	0	0.0269391			-0.00969881	-0.707725		-1.56962
2	53	2	0	0	0	0	0	2	2	1	1	1	0	0	0	19.9042	0.563794	0	9.4246			1.29894	-0.248879		0.974263
2	74	2	0	1	0	1	0	3	0	2	0	1	1	0	0	1.75435	0.0341898	0	0.0300679			0.244117	-1.4661		-1.5219
2	57	2	40	0	3	0	0	2	11	2	1	1	0	0	2.36298	104.458	0.241308	0	60.721		0.373459	2.01894	-0.617428		1.78334
2	64	0	50	0	0	0	0	1	3	0	1	0	0	0	0	21.2215	0.975017	0	30.1333			1.32678	-0.0109877		1.47905
1	51	2	35	1	2	1	1	4	5	2	1	1	1	0.0773293	0	102.432	0.518622	0	33.258	-1.11166		2.01044	-0.285149		1.5219
2	45	1	45	1	0	1	0	2	2	0	1	0	1	0	0	16.6503	0.337517	0	4.21433			1.22142	-0.471705		0.624729
2	31	2	0	0	0	0	0	1	1	0	1	0	0	0	1402.23	10.6501	0.313522	0	8.03544		3.14682	1.02736	-0.503732		0.90501
2	56	1	0	0	0	0	0	2	4	2	1	1	0	0.385916	0	41.0845	0.691026	0	13.9003	-0.413507		1.61368	-0.160506		1.14302
2	44	1	0	0	0	0	0	0	0	0	0	0	0	0	0	16.1818	0.332888	0	0			1.20903	-0.477702
2	59	2	0	0	0	1	0	0	0	0	0	0	0	1.13732	0	51.9987	4.75099	0	0.969187	0.0558833		1.71599	0.676784		-0.0135925
2	71	1	40	0	0	0	4	2	0	0	0	0	0	0	0	61.1318	2.11534	0	32.0279			1.78627	0.32538		1.50553
2	62	2	0	0	0	0	0	2	1	0	1	0	0	0	0	16.7747	0.467922	0	0.593804			1.22465	-0.329827		-0.226357
2	45	2	20	1	0	0	0	2	2	0	1	0	1	0	0	0.598213	0.113951	0	0.0400381			-0.223144	-0.943282		-1.39753
2	60	2	0	1	0	0	0	2	3	0	1	0	1	0	0	69.8798	5.61334	0	1.56275			1.84435	0.749222		0.193889
